# Supplementary material
Source: publisher site journal article supplement (https://www.spandidos-publications.com/4487/downloadSupplementary)
Supplement: Supplementary file 1 [file downloadSupplementary]

## Sheet: Sheet1
Table SI. Clinical information of patients with melanoma from TCGA database.
Id	futime	fustat	age	gender	stage	T	M	N
TCGA-3N-A9WB	518	1	71	MALE	Stage IA	T1a	M0	NX
TCGA-3N-A9WC	2022	0	82	MALE	Stage IIA	T2b	M0	NX
TCGA-3N-A9WD	395	1	82	MALE	Stage IIIA	T2a	M0	N1a
TCGA-BF-A1PU	387	0	46	FEMALE	Stage IIC	T4b	M0	N0
TCGA-BF-A1PX	282	1	56	MALE	Stage IIIB	T4b	M0	N2a
TCGA-BF-A1PZ	853	0	71	FEMALE	Stage IIB	T4a	M0	N0
TCGA-BF-A1Q0	831	0	80	MALE	Stage IIC	T4b	M0	N0
TCGA-BF-A3DJ	464	0	36	FEMALE	Stage IIIB	T4b	M0	N1
TCGA-BF-A3DL	769	0	84	FEMALE	Stage IIIB	T3b	M0	N2
TCGA-BF-A3DM	601	0	63	MALE	Stage IIA	T2b	M0	N0
TCGA-BF-A3DN	717	0	81	FEMALE	Stage IIIC	T3b	M0	N3
TCGA-BF-A5EO	703	0	65	MALE	Stage IIC	T4b	M0	N0
TCGA-BF-A5EP	335	0	75	FEMALE	Stage IIIC	T4b	M0	N3
TCGA-BF-A5EQ	323	0	63	MALE	Stage IIC	T4b	M0	N0
TCGA-BF-A5ER	327	0	63	MALE	Stage IIC	T4b	M0	N0
TCGA-BF-A5ES	490	0	76	FEMALE	Stage IIC	T4b	M0	N0
TCGA-BF-A9VF	440	0	77	MALE	Stage IIC	T4b	M0	N0
TCGA-BF-AAOU	476	0	73	FEMALE	Stage IIC	T4b	M0	N0
TCGA-BF-AAOX	444	0	83	MALE	Stage IIC	T4b	M0	N0
TCGA-BF-AAP0	454	0	40	FEMALE	Stage IV	T4	M1	NX
TCGA-BF-AAP1	409	0	86	MALE	Stage IIC	T4b	M0	N0
TCGA-BF-AAP2	405	0	62	MALE	Stage IIB	T3b	M0	N0
TCGA-BF-AAP4	335	0	61	MALE	Stage IIC	T4b	M0	N0
TCGA-BF-AAP6	325	0	55	MALE	Stage III	T4b	M0	N2
TCGA-BF-AAP7	318	0	76	FEMALE	Stage IIC	T4b	M0	N0
TCGA-BF-AAP8	447	0	58	MALE	Stage IIC	T4b	M0	N0
TCGA-D3-A1Q1	504	1	79	FEMALE	Stage IIIC	T1b	M0	N3
TCGA-D3-A1Q3	507	1	64	MALE	Stage IIC	T4b	M0	N0
TCGA-D3-A1Q4	3408	0	53	FEMALE	Stage IIIC	T2b	M0	N1b
TCGA-D3-A1Q5	3424	1	60	MALE	I/II NOS	TX	M0	N0
TCGA-D3-A1Q6	2184	1	55	MALE	Stage III	T4	M0	N1b
TCGA-D3-A1Q7	4053	0	42	FEMALE	Stage IB	T1b	M0	N0
TCGA-D3-A1Q8	854	1	33	MALE	Stage IV	T0	M1b	N3
TCGA-D3-A1Q9	961	1	72	MALE	Stage IIIB	T4b	M0	N2a
TCGA-D3-A1QA	2765	0	55	MALE	Stage IB	T2a	M0	N0
TCGA-D3-A1QB	2912	0	75	FEMALE	Stage III	T0	M0	N2c
TCGA-D3-A2J6	1321	1	65	MALE	Stage IIB	T3b	M0	N0
TCGA-D3-A2J7	3136	1	67	MALE	Stage IIIC	T3b	M0	N1b
TCGA-D3-A2J8	1992	1	48	MALE	Stage IB	T2a	M0	N0
TCGA-D3-A2J9	723	1	75	MALE	Stage IIIC	T4b	M0	N3
TCGA-D3-A2JA	3514	0	68	MALE	Stage IIIA	T2a	M0	N1a
TCGA-D3-A2JB	5110	1	70	FEMALE	Stage 0	Tis	M0	N0
TCGA-D3-A2JC	2639	0	53	FEMALE	Stage III	T0	M0	N2b
TCGA-D3-A2JD	361	1	58	MALE	Stage IIIC	T4b	M0	N1b
TCGA-D3-A2JE	841	1	75	FEMALE	Stage IIIC	TX	M0	N3
TCGA-D3-A2JF	1888	0	74	MALE	Stage IA	T1a	M0	N0
TCGA-D3-A2JG	3453	1	30	FEMALE	Stage IIIA	T3a	M0	N1a
TCGA-D3-A2JH	1280	0	68	MALE	Stage IB	T1b	M0	N0
TCGA-D3-A2JK	368	1	24	MALE	Stage IIIC	T4b	M0	N2b
TCGA-D3-A2JL	5219	0	43	FEMALE	I/II NOS	TX	M0	N0
TCGA-D3-A2JN	2022	1	46	FEMALE	Stage III	T0	M0	N1b
TCGA-D3-A2JO	2010	0	50	FEMALE	Stage IIIC	TX	M0	N3
TCGA-D3-A2JP	1812	0	37	MALE	Stage IIIC	T0	M0	N3
TCGA-D3-A3BZ	3976	0	63	MALE	Stage IIB	T4a	M0	N0
TCGA-D3-A3C6	1766	1	54	FEMALE	Stage IB	T2a	M0	N0
TCGA-D3-A3C7	1429	0	57	FEMALE	Stage III	T0	M0	N1b
TCGA-D3-A3C8	1409	0	58	FEMALE	Stage IIIC	TX	M0	N3
TCGA-D3-A3CB	5065	0	39	MALE	I/II NOS	T2	M0	N0
TCGA-D3-A3CC	2644	0	69	FEMALE	Stage IIC	T4b	M0	N0
TCGA-D3-A3CE	1832	1	74	FEMALE	Stage III	T0	M0	N1b
TCGA-D3-A3CF	746	1	61	FEMALE	Stage IIIC	T4b	M0	N3
TCGA-D3-A3ML	422	1	70	MALE	Stage IIIA	T3a	M0	N2a
TCGA-D3-A3MO	284	1	47	MALE	Stage III	TX	M0	N2c
TCGA-D3-A3MR	3151	0	42	MALE	Stage III	T0	M0	N1b
TCGA-D3-A3MU	1209	0	53	MALE	Stage IIIA	T3a	M0	N2a
TCGA-D3-A3MV	1378	0	38	FEMALE	Stage IIIB	T2b	M0	N2a
TCGA-D3-A51E	5318	0	39	FEMALE	I/II NOS	T2	M0	N0
TCGA-D3-A51F	1695	0	51	MALE	Stage IIIC	T4b	M0	N1b
TCGA-D3-A51H	1714	0	60	MALE	Stage IIIC	T1b	M0	N3
TCGA-D3-A51J	4414	0	19	MALE	Stage III	T0	M0	N1b
TCGA-D3-A51K	1002	0	51	MALE	Stage IIIB	Tis	M0	N2b
TCGA-D3-A51N	688	0	56	FEMALE	Stage IV	T0	M1c	N3
TCGA-D3-A51R	1941	0	60	MALE	Stage IIA	T3a	M0	N0
TCGA-D3-A51T	818	0	59	FEMALE	Stage IIIC	T4b	M0	N1b
TCGA-D3-A5GL	3826	0	74	MALE	Stage IB	T2a	M0	N0
TCGA-D3-A5GN	4129	0	15	FEMALE	Stage I	T1	M0	N0
TCGA-D3-A5GO	4195	0	61	MALE	Stage II	T4	M0	N0
TCGA-D3-A5GR	5424	0	23	FEMALE	Stage III	T1b	M0	N1
TCGA-D3-A5GS	553	0	58	MALE	Stage IV	T1b	M1c	N1b
TCGA-D3-A5GT	487	0	43	MALE	Stage IIIC	T2b	M0	N3
TCGA-D3-A5GU	3808	0	36	MALE	Stage IB	T1b	M0	N0
TCGA-D3-A8GB	938	1	48	MALE	Stage IIIB	T3a	M0	N1b
TCGA-D3-A8GC	2421	1	48	MALE	Stage IIIC	TX	M0	N3
TCGA-D3-A8GD	718	0	63	FEMALE	Stage IIIC	T4b	M0	N3
TCGA-D3-A8GE	804	0	26	MALE	Stage IV	TX	M1b	N0
TCGA-D3-A8GI	1780	1	68	MALE	Stage IA	T1a	M0	N0
TCGA-D3-A8GJ	7342	0	18	MALE	Stage II	T3	M0	N0
TCGA-D3-A8GK	5177	0	45	MALE	Stage IIA	T3a	M0	N0
TCGA-D3-A8GL	2711	1	43	MALE	Stage IIIB	T2a	M0	N1b
TCGA-D3-A8GM	3259	1	73	MALE	Stage IIB	T3b	M0	N0
TCGA-D3-A8GN	4897	0	27	FEMALE	I/II NOS	TX	M0	N0
TCGA-D3-A8GP	4638	0	77	MALE	Stage III	T2	M0	N2c
TCGA-D3-A8GQ	884	1	66	MALE	Stage II	T3	M0	N0
TCGA-D3-A8GR	3943	1	54	FEMALE	Stage 0	Tis	M0	N0
TCGA-D3-A8GS	3564	1	52	MALE	Stage I	T1	M0	N0
TCGA-D3-A8GV	5101	1	25	MALE	I/II NOS	TX	M0	N0
TCGA-D9-A148	4609	0	40	MALE	unknow	TX	M1b	N3
TCGA-D9-A149	1663	0	65	FEMALE	unknow	TX	M0	N1b
TCGA-D9-A1JX	216	1	80	FEMALE	unknow	TX	M0	NX
TCGA-D9-A1X3	551	0	63	MALE	unknow	T4b	unknow	N2b
TCGA-D9-A3Z1	468	1	66	MALE	Stage IIIC	T2a	M0	N3
TCGA-D9-A3Z3	678	0	39	FEMALE	Stage IIIB	T3a	M0	N1b
TCGA-D9-A3Z4	519	1	54	MALE	Stage IIIC	T4b	M0	N3
TCGA-D9-A4Z2	190	1	50	MALE	Stage IIIC	T4b	M0	N3
TCGA-D9-A4Z3	505	0	73	FEMALE	Stage IIIC	T4b	M0	N1b
TCGA-D9-A4Z5	218	0	68	MALE	Stage IIB	T4a	M0	N0
TCGA-D9-A4Z6	561	1	54	MALE	Stage IIIC	T3b	M0	N1b
TCGA-D9-A6E9	301	0	75	FEMALE	Stage IIIA	T3a	M0	N1
TCGA-D9-A6EA	766	0	70	MALE	Stage IIIC	T4a	M0	N3
TCGA-D9-A6EC	2015	0	56	MALE	Stage IIIA	T3a	M0	N1
TCGA-D9-A6EG	698	1	56	MALE	Stage IIIA	T4a	M0	N1
TCGA-DA-A1HV	1502	0	75	FEMALE	Stage IIIB	T0	M0	N2b
TCGA-DA-A1HW	428	0	37	FEMALE	Stage IIIB	T1a	M0	N1b
TCGA-DA-A1HY	3580	0	42	MALE	Stage III	T2b	M0	N1
TCGA-DA-A1I0	594	0	63	MALE	Stage IV	T4b	M1a	N3
TCGA-DA-A1I1	5941	0	55	MALE	Stage III	T0	M0	N2a
TCGA-DA-A1I2	5088	0	45	MALE	Stage III	T4b	M0	N2b
TCGA-DA-A1I4	1093	1	51	MALE	Stage IIIC	T3b	M0	N2b
TCGA-DA-A1I5	3280	0	27	FEMALE	Stage IV	T1a	M1c	N0
TCGA-DA-A1I7	1876	0	62	MALE	Stage IIIB	T0	M0	N2b
TCGA-DA-A1I8	1368	0	63	FEMALE	Stage IIC	T4b	M0	N0
TCGA-DA-A1IA	2005	1	32	FEMALE	Stage IIIB	T2a	M0	N1b
TCGA-DA-A1IB	454	0	69	FEMALE	Stage IIIC	T2b	M0	N2b
TCGA-DA-A1IC	2071	1	81	MALE	Stage IIIB	T3a	M0	N2c
TCGA-DA-A3F2	657	0	55	MALE	Stage IIIB	T4a	M0	N2b
TCGA-DA-A3F3	319	1	52	MALE	Stage IIIB	T0	M0	N2b
TCGA-DA-A3F5	6446	0	45	MALE	Stage I	T1a	M0	N0
TCGA-DA-A3F8	492	0	39	MALE	Stage IIIB	T2a	M0	N2b
TCGA-DA-A95V	1455	0	83	FEMALE	Stage IIC	T4b	unknow	N0
TCGA-DA-A95W	398	0	52	MALE	Stage IIIB	TX	M0	N1b
TCGA-DA-A95X	1513	0	62	MALE	Stage IB	T2a	M0	N0
TCGA-DA-A95Y	430	1	68	MALE	Stage IIC	T4b	M0	N0
TCGA-DA-A95Z	396	0	87	MALE	Stage IV	TX	M1a	N0
TCGA-DA-A960	804	0	73	MALE	Stage IIB	T3b	M0	N0
TCGA-EB-A1NK	613	0	48	MALE	Stage IIC	T4b	M0	N0
TCGA-EB-A24C	632	0	56	MALE	unknow	T4b	M0	NX
TCGA-EB-A24D	645	0	72	MALE	Stage IIIB	T4a	M0	N2b
TCGA-EB-A299	378	0	63	MALE	Stage IIA	T2b	M0	N0
TCGA-EB-A3HV	39	0	37	MALE	Stage IIC	T4b	M0	N0
TCGA-EB-A3XB	408	0	63	MALE	Stage II	T4	M0	NX
TCGA-EB-A3XC	650	0	74	MALE	Stage IIC	T4b	M0	N0
TCGA-EB-A3XD	430	0	53	FEMALE	Stage IIC	T4b	M0	NX
TCGA-EB-A3XE	180	0	77	FEMALE	Stage IIA	T3a	M0	N0
TCGA-EB-A3XF	278	0	57	MALE	Stage IIC	T4b	M0	N0
TCGA-EB-A3Y6	126	0	56	FEMALE	Stage IIC	T4b	M0	N0
TCGA-EB-A3Y7	326	1	86	FEMALE	Stage IIIB	T3a	M0	N2c
TCGA-EB-A41B	291	0	76	FEMALE	Stage IIC	T4b	M0	N0
TCGA-EB-A42Y	440	0	73	FEMALE	Stage IIC	T4b	M0	N0
TCGA-EB-A42Z	441	0	49	MALE	Stage IIIC	T4b	M0	N1b
TCGA-EB-A431	568	0	34	MALE	Stage IIC	T4b	M0	N0
TCGA-EB-A44N	205	1	59	MALE	Stage IIC	T4b	M0	N0
TCGA-EB-A44O	81	0	69	MALE	Stage IIB	T4a	M0	N0
TCGA-EB-A44P	376	0	58	FEMALE	Stage IIC	T4b	M0	N0
TCGA-EB-A44Q	422	0	51	FEMALE	Stage IIIC	TX	M0	N3
TCGA-EB-A44R	315	1	52	MALE	Stage IIIB	TX	M0	N2b
TCGA-EB-A4IQ	414	0	42	FEMALE	Stage IIIB	T4b	M0	N1
TCGA-EB-A4IS	405	0	77	MALE	Stage IIB	T3b	M0	NX
TCGA-EB-A4OY	593	0	65	FEMALE	Stage IIIB	T4b	M0	N1a
TCGA-EB-A4OZ	620	0	41	FEMALE	Stage IIIC	T4a	M0	N3
TCGA-EB-A4P0	326	1	82	MALE	Stage IIC	T4b	M0	N0
TCGA-EB-A4XL	777	0	56	FEMALE	Stage IIC	T4b	M0	NX
TCGA-EB-A51B	537	0	53	MALE	Stage IIC	T4b	M0	NX
TCGA-EB-A550	264	1	75	FEMALE	Stage IIC	T4b	M0	NX
TCGA-EB-A551	590	0	78	FEMALE	Stage IIIC	T4b	M0	N2b
TCGA-EB-A553	226	0	62	MALE	Stage IIC	T4b	M0	N0
TCGA-EB-A57M	399	0	56	MALE	Stage IIIB	T4b	M0	N1
TCGA-EB-A5FP	454	1	65	FEMALE	Stage IV	T4b	M1b	NX
TCGA-EB-A5KH	619	1	55	MALE	Stage III	T0	M0	N1
TCGA-EB-A5SE	401	1	73	MALE	Stage IIB	T3b	M0	NX
TCGA-EB-A5SF	369	1	78	FEMALE	Stage IIC	T4b	M0	NX
TCGA-EB-A5SG	2076	0	57	FEMALE	unknow	unknow	unknow	unknow
TCGA-EB-A5SH	1643	0	60	FEMALE	Stage III	T4	M0	N0
TCGA-EB-A5UL	526	0	71	MALE	Stage III	TX	M0	N1
TCGA-EB-A5UM	414	0	48	FEMALE	Stage IIC	T4b	M0	N0
TCGA-EB-A5UN	1582	0	49	MALE	Stage IIC	T4b	M0	NX
TCGA-EB-A5VU	321	1	56	MALE	Stage IIIB	T4b	M0	N1
TCGA-EB-A5VV	214	0	74	FEMALE	Stage IIIB	T3b	M0	N1
TCGA-EB-A6L9	757	0	55	MALE	Stage IIIC	TX	M0	N3
TCGA-EB-A6QY	382	0	71	MALE	Stage IIC	T4b	M0	N0
TCGA-EB-A6QZ	352	1	76	FEMALE	Stage IIA	T3a	M0	N0
TCGA-EB-A6R0	467	0	58	FEMALE	Stage IIC	T4b	M0	N0
TCGA-EB-A82B	390	0	58	FEMALE	Stage III	T4b	M0	N2
TCGA-EB-A85I	362	0	66	MALE	Stage IIC	T4b	M0	N0
TCGA-EB-A85J	360	0	66	FEMALE	Stage IIB	T4a	M0	N0
TCGA-EB-A97M	414	0	66	MALE	Stage IIC	T4b	M0	N0
TCGA-EE-A17X	907	1	54	MALE	Stage IA	T1a	M0	N0
TCGA-EE-A17Y	828	1	69	MALE	Stage IIIB	T3b	M0	N1a
TCGA-EE-A17Z	263	1	57	MALE	Stage IIB	T4a	M0	N0
TCGA-EE-A180	2889	1	69	MALE	Stage III	T4a	M0	N0
TCGA-EE-A181	1026	1	82	FEMALE	Stage II	T3	M0	N0
TCGA-EE-A182	447	1	84	FEMALE	Stage IIIC	T4b	M0	N1b
TCGA-EE-A183	818	1	48	MALE	Stage 0	Tis	M0	N0
TCGA-EE-A184	2073	1	72	MALE	Stage IB	T2a	M0	N0
TCGA-EE-A185	151	1	55	FEMALE	Stage IIIC	T4b	M0	N3
TCGA-EE-A20B	4070	0	66	FEMALE	Stage II	T3	M0	N0
TCGA-EE-A20C	4601	1	59	MALE	Stage 0	Tis	M0	N0
TCGA-EE-A20F	2785	0	53	MALE	Stage I	T1	M0	N0
TCGA-EE-A20H	5118	1	56	MALE	Stage I	T2	M0	N0
TCGA-EE-A20I	412	1	79	MALE	Stage IV	TX	M1c	N0
TCGA-EE-A29A	1927	1	68	MALE	Stage IIIA	T3a	M0	N1a
TCGA-EE-A29B	2588	1	67	MALE	Stage IIB	T3b	M0	N0
TCGA-EE-A29C	2402	1	20	MALE	Stage IB	T2a	M0	N0
TCGA-EE-A29D	425	1	87	MALE	Stage IIIC	T3b	M0	N1b
TCGA-EE-A29E	1940	0	54	MALE	Stage IIIB	T3a	M0	N1b
TCGA-EE-A29G	2192	1	53	MALE	Stage IIIA	T4a	M0	N2a
TCGA-EE-A29H	1966	0	59	FEMALE	Stage IA	T1a	M0	N0
TCGA-EE-A29L	79	1	78	MALE	Stage IIIC	T4b	M0	N3
TCGA-EE-A29M	1729	0	33	FEMALE	Stage IB	T2a	M0	N0
TCGA-EE-A29N	566	1	78	MALE	I/II NOS	TX	M0	N0
TCGA-EE-A29P	1716	0	73	FEMALE	Stage IIC	T4b	M0	N0
TCGA-EE-A29Q	2030	1	70	FEMALE	Stage IIB	T3b	M0	N0
TCGA-EE-A29R	440	0	48	FEMALE	Stage IIIC	T3b	M0	N1b
TCGA-EE-A29S	1864	1	79	MALE	Stage IIA	T3a	M0	N0
TCGA-EE-A29T	11252	0	51	FEMALE	unknow	TX	M0	NX
TCGA-EE-A29V	787	1	85	MALE	Stage IIIC	T3b	M0	N1b
TCGA-EE-A29W	5932	0	42	MALE	Stage 0	Tis	M0	N0
TCGA-EE-A29X	545	1	58	FEMALE	Stage IB	T2a	M0	N0
TCGA-EE-A2A0	1424	1	77	FEMALE	Stage IIA	T3a	M0	N0
TCGA-EE-A2A1	3130	0	46	MALE	Stage IB	T2a	M0	N0
TCGA-EE-A2A2	1120	0	71	MALE	Stage IIIC	T4b	M0	N1b
TCGA-EE-A2A5	1195	1	43	MALE	Stage IB	T2a	M0	N0
TCGA-EE-A2A6	2620	0	43	MALE	Stage IA	T1a	M0	N0
TCGA-EE-A2GB	1803	0	51	MALE	Stage IIIB	T2b	M0	N1a
TCGA-EE-A2GC	2051	0	82	MALE	Stage IIB	T3b	M0	N0
TCGA-EE-A2GD	10346	1	58	FEMALE	Stage IIB	T4	M0	N0
TCGA-EE-A2GE	4898	0	44	MALE	Stage I	T2	M0	N0
TCGA-EE-A2GH	6328	0	34	MALE	Stage I	T2	M0	N0
TCGA-EE-A2GI	1482	0	39	MALE	Stage IA	T1a	M0	N0
TCGA-EE-A2GJ	2270	0	83	MALE	Stage IA	T1a	M0	N0
TCGA-EE-A2GK	1665	0	46	FEMALE	Stage I	T1	M0	N0
TCGA-EE-A2GL	2423	0	40	FEMALE	Stage IIA	T3a	M0	N0
TCGA-EE-A2GM	2296	0	70	FEMALE	Stage IIC	T4b	M0	N0
TCGA-EE-A2GN	3106	1	67	MALE	Stage IIA	T2b	M0	N0
TCGA-EE-A2GO	3857	0	66	FEMALE	Stage II	T3b	M0	N0
TCGA-EE-A2GP	423	1	80	MALE	Stage IIIB	T4b	M0	N1a
TCGA-EE-A2GR	1301	1	78	MALE	Stage II	T4	M0	N0
TCGA-EE-A2GS	2470	1	28	FEMALE	Stage IB	T2a	M0	N0
TCGA-EE-A2GT	1365	0	77	MALE	Stage IIA	T3a	M0	N0
TCGA-EE-A2GU	2884	0	65	FEMALE	Stage IA	T1a	M0	N0
TCGA-EE-A2M5	659	1	49	MALE	Stage I	T2	M0	N0
TCGA-EE-A2M6	3932	0	61	MALE	Stage I	T1	M0	N0
TCGA-EE-A2M7	877	1	66	MALE	Stage II	T3a	M0	N0
TCGA-EE-A2M8	601	1	54	FEMALE	Stage III	T3a	M0	N1
TCGA-EE-A2MC	1871	1	73	MALE	Stage I	T2	M0	N0
TCGA-EE-A2MD	1438	1	52	MALE	Stage II	T3a	M0	N0
TCGA-EE-A2ME	3141	1	51	MALE	Stage I	T2	M0	N0
TCGA-EE-A2MF	8174	1	39	FEMALE	Stage I	T2	M0	N0
TCGA-EE-A2MG	3139	1	23	MALE	Stage I	T2	M0	N0
TCGA-EE-A2MH	516	1	66	MALE	Stage III	T4a	M0	N0
TCGA-EE-A2MI	6225	1	43	MALE	Stage IIB	T4	M0	N0
TCGA-EE-A2MJ	2927	1	60	MALE	Stage III	T4b	M0	N0
TCGA-EE-A2MK	4825	0	18	FEMALE	Stage III	T4a	M0	N0
TCGA-EE-A2ML	6590	1	35	MALE	Stage II	T3a	M0	N0
TCGA-EE-A2MM	5107	1	63	FEMALE	Stage I	T2	M0	N0
TCGA-EE-A2MN	1446	1	58	MALE	Stage I	T2	M0	N0
TCGA-EE-A2MP	7563	0	34	FEMALE	Stage I	T2	M0	N0
TCGA-EE-A2MQ	1315	1	70	FEMALE	Stage IIIA	T3a	M0	N2a
TCGA-EE-A2MR	4088	0	61	MALE	Stage I	T2	M0	N0
TCGA-EE-A2MS	4942	0	72	MALE	Stage II	T3a	M0	N0
TCGA-EE-A2MT	2166	0	45	MALE	Stage IB	T2a	M0	N0
TCGA-EE-A2MU	1620	0	71	MALE	Stage IA	T1a	M0	N0
TCGA-EE-A3AA	3781	0	47	MALE	Stage III	T0	M0	N2a
TCGA-EE-A3AB	3733	0	30	MALE	Stage III	T0	M0	N2a
TCGA-EE-A3AC	1570	0	47	MALE	Stage III	T0	M0	N2b
TCGA-EE-A3AD	875	1	50	MALE	Stage III	T0	M0	N1b
TCGA-EE-A3AE	1658	0	52	FEMALE	Stage IA	T1a	M0	N0
TCGA-EE-A3AF	420	1	48	FEMALE	Stage IIIC	T0	M0	N3
TCGA-EE-A3AG	1265	1	25	MALE	Stage III	T0	M0	N2c
TCGA-EE-A3AH	4222	1	30	MALE	Stage II	T3b	M0	N0
TCGA-EE-A3J3	5237	1	42	MALE	Stage IB	T2	M0	N0
TCGA-EE-A3J4	3869	1	72	MALE	Stage II	T3a	M0	N0
TCGA-EE-A3J5	1124	1	71	MALE	Stage III	T4a	M0	N1
TCGA-EE-A3J7	1949	0	43	MALE	Stage I	T2	M0	N0
TCGA-EE-A3J8	1044	1	59	MALE	Stage IIIA	T4a	M0	N1a
TCGA-EE-A3JA	1618	1	44	MALE	Stage IB	T2a	M0	N0
TCGA-EE-A3JB	6138	0	60	FEMALE	Stage III	T3a	M0	N1
TCGA-EE-A3JD	832	1	70	MALE	Stage III	TX	M0	N2b
TCGA-EE-A3JE	1562	0	75	MALE	Stage IIIB	T3b	M0	N1a
TCGA-EE-A3JH	3333	0	54	MALE	Stage IB	T2	M0	N0
TCGA-EE-A3JI	4648	1	48	MALE	Stage I	T2	M0	N0
TCGA-ER-A193	955	1	62	MALE	Stage IIB	T3b	M0	N0
TCGA-ER-A194	1354	1	77	MALE	unknow	unknow	M0	N0
TCGA-ER-A195	1078	1	46	MALE	unknow	TX	M0	N0
TCGA-ER-A196	1785	0	64	FEMALE	Stage IIC	T4b	M0	N0
TCGA-ER-A197	424	1	83	FEMALE	Stage IIIB	T4b	M0	N1a
TCGA-ER-A198	1544	1	45	MALE	unknow	unknow	M0	NX
TCGA-ER-A199	279	1	86	FEMALE	Stage IIIC	T4b	M0	N3
TCGA-ER-A19A	2365	0	79	MALE	Stage IV	TX	M1	N0
TCGA-ER-A19B	2993	1	42	MALE	unknow	TX	M0	N0
TCGA-ER-A19C	1487	1	77	MALE	Stage I	T2a	M0	NX
TCGA-ER-A19D	383	1	46	FEMALE	Stage IB	T2a	M0	N0
TCGA-ER-A19E	396	1	36	FEMALE	Stage IB	T2a	M0	N0
TCGA-ER-A19F	802	1	82	MALE	unknow	unknow	M0	N0
TCGA-ER-A19G	9188	0	48	FEMALE	unknow	unknow	M0	N0
TCGA-ER-A19H	4634	1	40	MALE	unknow	unknow	M0	N0
TCGA-ER-A19J	196	1	54	MALE	Stage IV	TX	M1	N3
TCGA-ER-A19K	469	1	79	FEMALE	Stage IIC	T4b	M0	N0
TCGA-ER-A19L	4000	1	35	MALE	unknow	unknow	unknow	unknow
TCGA-ER-A19M	1857	1	36	MALE	Stage IB	T2a	M0	N0
TCGA-ER-A19N	1341	1	47	MALE	unknow	unknow	unknow	unknow
TCGA-ER-A19P	4930	1	47	FEMALE	unknow	unknow	M0	N0
TCGA-ER-A19Q	1548	1	37	FEMALE	unknow	unknow	M0	N0
TCGA-ER-A19S	1505	0	81	FEMALE	unknow	unknow	unknow	unknow
TCGA-ER-A19T	270	1	51	MALE	Stage IV	T4a	M1a	N3
TCGA-ER-A19W	4507	1	48	FEMALE	unknow	unknow	unknow	unknow
TCGA-ER-A1A1	3196	0	58	MALE	Stage IIIC	TX	M0	N3
TCGA-ER-A2NB	857	1	57	MALE	Stage IIIB	T4b	M0	N2
TCGA-ER-A2NC	1333	1	50	MALE	Stage IB	T2a	M0	N0
TCGA-ER-A2ND	710	1	57	FEMALE	Stage IIIC	T1b	M0	N3
TCGA-ER-A2NE	613	1	39	MALE	Stage 0	Tis	M0	N0
TCGA-ER-A2NF	877	1	53	MALE	Stage IIIB	T3b	M0	N3
TCGA-ER-A2NG	1490	1	43	FEMALE	Stage IIIC	T3b	M0	N3
TCGA-ER-A2NH	1264	0	49	MALE	Stage IIIC	T3a	M0	N3
TCGA-ER-A3ES	7514	1	25	MALE	unknow	unknow	unknow	unknow
TCGA-ER-A3ET	2829	1	64	FEMALE	Stage IIIA	T3a	M0	N1a
TCGA-ER-A3EV	1429	1	55	MALE	Stage III	T4	M0	N0
TCGA-ER-A3PL	1010	0	30	MALE	Stage IV	T3b	M1a	N0
TCGA-ER-A42H	426	1	76	MALE	unknow	unknow	unknow	unknow
TCGA-ER-A42K	394	1	40	FEMALE	Stage IIIC	T4b	M0	N3
TCGA-ER-A42L	4533	0	49	MALE	Stage II	T3	M0	N0
TCGA-FR-A2OS	368	1	49	FEMALE	Stage IIC	T4b	M0	N0
TCGA-FR-A3R1	685	0	69	MALE	Stage IIC	T4b	M0	N0
TCGA-FR-A3YN	2828	0	44	MALE	Stage IB	T2a	M0	N0
TCGA-FR-A44A	5299	0	29	FEMALE	Stage II	T3a	M0	N0
TCGA-FR-A69P	478	0	34	FEMALE	Stage IIIC	TX	unknow	N3
TCGA-FR-A728	583	0	54	FEMALE	Stage IIIB	T4b	M0	N2a
TCGA-FR-A729	6716	0	38	FEMALE	Stage I	T1	M0	N0
TCGA-FR-A7U8	847	0	50	MALE	Stage IIIC	TX	M0	N3
TCGA-FR-A7U9	571	0	63	FEMALE	Stage IIIC	T3b	M0	N3
TCGA-FR-A7UA	1164	0	65	FEMALE	Stage IB	T2a	M0	N0
TCGA-FR-A8YC	1059	1	78	MALE	Stage IIB	T3b	M0	N0
TCGA-FR-A8YD	1103	1	56	FEMALE	Stage IIC	T4b	M0	N0
TCGA-FR-A8YE	3176	0	41	MALE	Stage IA	T1a	M0	N0
TCGA-FS-A1YW	6598	1	52	MALE	Stage IB	T1b	M0	N0
TCGA-FS-A1YX	1478	1	39	FEMALE	Stage I	T2	M0	N0
TCGA-FS-A1YY	6953	1	55	FEMALE	Stage IIA	T3a	M0	N0
TCGA-FS-A1Z0	6164	1	32	FEMALE	Stage IA	T1a	M0	N0
TCGA-FS-A1Z3	636	1	72	FEMALE	Stage IV	TX	M1	N0
TCGA-FS-A1Z4	854	1	62	MALE	Stage I	T1	M0	N0
TCGA-FS-A1Z7	237	1	19	MALE	Stage IIIC	T4b	M0	N1b
TCGA-FS-A1ZA	843	1	45	FEMALE	Stage IIIB	T4b	M0	N2c
TCGA-FS-A1ZB	1486	1	57	MALE	Stage II	T3a	M0	N0
TCGA-FS-A1ZC	10870	1	51	MALE	I/II NOS	TX	M0	N0
TCGA-FS-A1ZD	1628	1	63	MALE	Stage IIA	T2b	M0	N0
TCGA-FS-A1ZE	1413	1	40	MALE	Stage IIC	T4b	M0	N0
TCGA-FS-A1ZF	470	1	78	FEMALE	Stage IIC	T4b	M0	N0
TCGA-FS-A1ZG	295	1	60	FEMALE	Stage IIIC	T4b	M0	N2b
TCGA-FS-A1ZH	996	1	71	FEMALE	Stage IV	T3b	M1c	N2c
TCGA-FS-A1ZJ	1441	1	75	FEMALE	Stage I	T2	M0	N0
TCGA-FS-A1ZK	728	1	68	MALE	Stage II	T4	M0	N0
TCGA-FS-A1ZM	3080	0	74	MALE	Stage III	T2	M0	N2c
TCGA-FS-A1ZN	730	1	43	MALE	Stage IIIA	T4b	M0	N1a
TCGA-FS-A1ZP	2273	1	52	MALE	Stage II	T3	M0	N0
TCGA-FS-A1ZQ	4062	1	31	MALE	I/II NOS	TX	M0	N0
TCGA-FS-A1ZR	347	1	36	MALE	Stage II	T2	M0	N0
TCGA-FS-A1ZS	4526	0	54	MALE	Stage I	T2	M0	N0
TCGA-FS-A1ZT	1617	0	55	MALE	Stage III	T2	M0	N1b
TCGA-FS-A1ZU	808	1	70	FEMALE	Stage IIC	T4b	M0	N0
TCGA-FS-A1ZW	1505	0	65	MALE	Stage IIIB	T2b	M0	N1a
TCGA-FS-A1ZY	824	1	71	MALE	Stage IIB	T3b	M0	N0
TCGA-FS-A1ZZ	822	1	54	FEMALE	Stage IIB	T3b	M0	N0
TCGA-FS-A4F0	2367	0	67	FEMALE	Stage IIB	T4a	M0	N0
TCGA-FS-A4F2	1525	1	46	FEMALE	Stage IIC	T4b	M0	N0
TCGA-FS-A4F4	2028	1	64	MALE	Stage II	T3a	M0	N0
TCGA-FS-A4F5	874	1	77	FEMALE	Stage IB	T2a	M0	N0
TCGA-FS-A4F8	5318	1	52	MALE	Stage I	T1	M0	N0
TCGA-FS-A4F9	1035	0	80	MALE	Stage IIIC	T4b	M0	N3
TCGA-FS-A4FB	813	1	46	FEMALE	Stage III	T2	M0	N1a
TCGA-FS-A4FC	1655	1	75	FEMALE	Stage IIA	T3a	M0	N0
TCGA-FS-A4FD	2454	1	39	MALE	Stage IIIC	T2	M0	N3
TCGA-FW-A3I3	531	0	59	FEMALE	Stage IV	unknow	M1	N0
TCGA-FW-A3R5	1124	0	68	MALE	Stage III	TX	M0	N2
TCGA-FW-A3TU	1691	1	72	FEMALE	unknow	unknow	unknow	unknow
TCGA-FW-A3TV	411	0	57	FEMALE	Stage IIIB	T1	M0	N2b
TCGA-FW-A5DX	640	0	71	MALE	Stage IIIC	T4a	unknow	N3
TCGA-FW-A5DY	587	0	48	FEMALE	Stage III	T3	unknow	N1
TCGA-GF-A3OT	301	0	58	FEMALE	Stage IIIC	T3	M0	N3
TCGA-GF-A4EO	591	0	74	FEMALE	Stage IIIC	T0	M0	N3
TCGA-GF-A6C8	62	0	62	FEMALE	Stage IIB	T3b	M0	NX
TCGA-GF-A6C9	480	0	78	MALE	Stage IIIB	unknow	unknow	unknow
TCGA-GF-A769	1070	1	39	MALE	Stage IIC	T4b	M0	NX
TCGA-GN-A262	3847	0	47	FEMALE	unknow	unknow	unknow	unknow
TCGA-GN-A263	467	1	24	MALE	Stage IV	T4b	M1c	N3
TCGA-GN-A264	3587	1	60	MALE	unknow	unknow	unknow	unknow
TCGA-GN-A265	2948	0	53	MALE	unknow	unknow	unknow	unknow
TCGA-GN-A266	308	1	45	MALE	unknow	unknow	unknow	unknow
TCGA-GN-A267	1960	1	38	MALE	Stage IIIA	T4a	M0	N1a
TCGA-GN-A268	1910	1	83	FEMALE	Stage IIB	T4a	M0	N0
TCGA-GN-A269	170	1	70	MALE	Stage IIIC	T4b	M0	N3
TCGA-GN-A26A	988	1	63	FEMALE	Stage IIIA	T3a	M0	N1a
TCGA-GN-A26C	821	1	77	MALE	Stage IIIC	T4b	M0	N2b
TCGA-GN-A26D	1460	1	72	FEMALE	Stage IIC	T4b	unknow	N0
TCGA-GN-A4U3	3708	0	30	MALE	Stage III	T3a	M0	N1a
TCGA-GN-A4U4	1197	0	73	MALE	Stage IIA	T2b	M0	NX
TCGA-GN-A4U5	1156	0	61	FEMALE	Stage IB	T2a	M0	NX
TCGA-GN-A4U7	317	1	56	FEMALE	Stage IIIC	T2b	M0	N3
TCGA-GN-A4U8	1487	0	51	MALE	unknow	unknow	unknow	unknow
TCGA-GN-A4U9	673	1	71	MALE	Stage IIIC	T2b	M0	N3
TCGA-GN-A8LK	1524	1	70	MALE	Stage IB	T1b	unknow	NX
TCGA-GN-A8LL	650	1	68	FEMALE	Stage IIC	T4b	M0	NX
TCGA-GN-A8LN	603	0	68	MALE	Stage IIC	T4b	M0	NX
TCGA-GN-A9SD	1807	1	59	FEMALE	Stage IA	T1a	M0	NX
TCGA-HR-A2OH	2004	1	46	FEMALE	Stage IIIB	T3b	M0	N2a
TCGA-IH-A3EA	524	0	61	MALE	Stage IIC	T4b	M0	N0
TCGA-LH-A9QB	11217	0	24	FEMALE	unknow	unknow	unknow	unknow
TCGA-OD-A75X	9061	1	49	MALE	unknow	TX	M0	NX
TCGA-QB-A6FS	220	0	49	MALE	Stage IIIC	T0	M0	N3
TCGA-QB-AA9O	549	1	73	MALE	Stage IIIC	TX	M0	N3
TCGA-W3-A824	6940	0	63	MALE	Stage I	T2	M0	N0
TCGA-W3-A825	1917	1	60	FEMALE	Stage II	T3	M0	N0
TCGA-W3-A828	3683	1	66	MALE	Stage II	T3	M0	N0
TCGA-W3-AA1O	122	1	85	MALE	Stage III	TX	M0	N2
TCGA-W3-AA1Q	2101	1	57	MALE	Stage III	TX	M0	N1
TCGA-W3-AA1R	3379	1	71	MALE	Stage II	T3	M0	N0
TCGA-W3-AA1V	1280	1	63	MALE	Stage II	T3	M0	N0
TCGA-W3-AA1W	6666	0	64	MALE	Stage II	T3	M0	N0
TCGA-W3-AA21	3195	1	26	MALE	Stage I	T2	M0	N0
TCGA-WE-A8JZ	731	0	70	MALE	Stage IIIB	T4b	M0	N1a
TCGA-WE-A8K1	1492	0	74	MALE	Stage IIIC	T3b	M0	N3
TCGA-WE-A8K4	509	0	85	MALE	Stage IIB	T4a	M0	NX
TCGA-WE-A8K5	1860	1	65	MALE	Stage IV	T2a	M1c	N3
TCGA-WE-A8K6	486	0	79	MALE	Stage IIIB	TX	M0	N1b
TCGA-WE-A8ZM	3008	0	70	MALE	Stage IIIB	TX	M0	N1b
TCGA-WE-A8ZN	1794	0	57	MALE	Stage IIB	T4a	M0	NX
TCGA-WE-A8ZO	2057	0	73	FEMALE	Stage IIIB	T3a	M0	N1b
TCGA-WE-A8ZQ	1818	0	48	MALE	Stage IIA	T3a	M0	N0
TCGA-WE-A8ZR	274	1	49	MALE	Stage IIIC	T4b	M0	N1b
TCGA-WE-A8ZT	359	0	25	FEMALE	Stage IV	T3b	M1b	N1b
TCGA-WE-A8ZX	991	0	45	MALE	Stage IIIB	TX	M0	N1b
TCGA-WE-A8ZY	1506	1	62	MALE	Stage IIA	T3a	M0	NX
TCGA-WE-AA9Y	370	0	37	MALE	Stage IIIC	T2a	M0	N3
TCGA-WE-AAA0	1065	0	47	MALE	Stage IA	T1a	M0	N0
TCGA-WE-AAA3	600	0	84	FEMALE	Stage IIIC	T4b	M0	N2b
TCGA-WE-AAA4	678	0	56	FEMALE	Stage IIIC	TX	M0	N3
TCGA-XV-A9W2	417	0	81	MALE	Stage I	T1	M0	N0
TCGA-XV-A9W5	392	0	51	MALE	I/II NOS	T2	M0	N0
TCGA-XV-AAZV	412	0	56	FEMALE	Stage II	T4	M0	N0
TCGA-XV-AAZW	393	1	62	FEMALE	Stage II	T4	M0	N0
TCGA-XV-AAZY	405	0	76	FEMALE	Stage IIIC	T4	M0	N3
TCGA-XV-AB01	403	0	54	FEMALE	Stage II	T3	M0	NX
TCGA-YD-A89C	210	0	43	FEMALE	Stage IA	T1a	M0	NX
TCGA-YD-A9TA	1496	0	75	MALE	unknow	unknow	unknow	unknow
TCGA-YG-AA3N	306	0	67	MALE	Stage IIC	T4b	M0	N0
TCGA-YG-AA3O	1154	1	62	MALE	unknow	unknow	unknow	unknow
TCGA-YG-AA3P	439	0	63	FEMALE	Stage IIB	T4a	M0	N0
TCGA-Z2-A8RT	839	0	42	FEMALE	Stage IIB	T3b	M0	N0
TCGA-Z2-AA3S	2950	0	58	MALE	Stage IA	T1a	M0	N0
TCGA-Z2-AA3V	486	0	57	FEMALE	Stage IA	T1a	M0	N0
TCGA-XV-A9VZ
TCGA-YD-A9TB
TCGA-BF-A1PV
TCGA-D3-A3C1
TCGA-D3-A3C3
TCGA-D3-A51G
TCGA-D3-A8GO
TCGA-EB-A41A
TCGA-EB-A430
TCGA-EB-A82C
TCGA-ER-A19O
TCGA-FR-A3YO
TCGA-FR-A726
TCGA-GF-A2C7
TCGA-HR-A2OG
TCGA-HR-A5NC
TCGA-RP-A690
TCGA-RP-A693
TCGA-RP-A694
TCGA-RP-A695
TCGA-RP-A6K9
TCGA-EE-A3AE
TCGA-GN-A269
